# Supplementary material
Source: ML conference proceedings conference paper supplement (https://proceedings.neurips.cc/paper_files/paper/2012/hash/7380ad8a673226ae47fce7bff88e9c33-Abstract.html)
Supplement: Supplementary file [file 7380ad8a673226ae47fce7bff88e9c33-Supplemental.zip]

---

## Supplementary Material — Proof of the Theorems

---

**Chi Jin**

Key Laboratory of Machine Perception, MOE  
School of Physics  
Peking University  
chijin06@gmail.com

**Liwei Wang**

Key Laboratory of Machine Perception, MOE  
School of EECS  
Peking University  
wanglw@cis.pku.edu.cn

Here we give proof sketches of the theorems and propositions as well as some technical discussions.

**Proof of Theorem 3.1.** The proof is an application of the PAC-Bayes theorem (Theorem 2.1) and a refinement of the proof of Theorem 2.2.

First observe that when considering distributions of homogeneous linear classifiers  $c_{\mathbf{w}}$  in  $\mathbb{R}^d$ , we only need to restrict ourselves in distributions of  $\mathbf{w}$  on the  $(d-1)$ -dimensional unit sphere  $S^{d-1}$ . For any probability distribution  $\pi$  of vectors in  $\mathbb{R}^d$ , let  $\pi_p$  denote the corresponding probability distribution on  $S^{d-1}$  by projecting  $\pi$  from  $\mathbb{R}^d$  to  $S^{d-1}$ .

Choose the prior distribution  $P$  of classifiers  $c_{\mathbf{w}} = \text{sgn}(\langle \mathbf{w}, \cdot \rangle)$  corresponding to  $\mathbf{w} \sim \mathcal{N}_p(0, \mathbf{I})$ , i.e., the uniform distribution on  $S^{d-1}$ . Let the posterior distribution  $Q(\mu, \hat{\mathbf{w}})$  be defined as in Theorem 3.1. It is obvious that  $Q(\mu, \hat{\mathbf{w}})$  of  $c_{\mathbf{w}}$  corresponds to the distribution of  $\mathbf{w} \sim \mathcal{N}_p(\mu \hat{\mathbf{w}}, I)$ . Thus to finish the proof we only need to show

$$\text{KL}(\mathcal{N}_p(\mu \hat{\mathbf{w}}, \mathbf{I}) || \mathcal{N}_p(0, \mathbf{I})) \leq \frac{d}{2} \ln(1 + \frac{\mu^2}{d}). \quad (1)$$

Observe that for all  $\sigma > 0$ , we have

$$\begin{aligned} \text{KL}(\mathcal{N}_p(\mu \hat{\mathbf{w}}, \mathbf{I}) || \mathcal{N}_p(0, \mathbf{I})) &= \text{KL}(\mathcal{N}_p(\mu \hat{\mathbf{w}}, \mathbf{I}) || \mathcal{N}_p(0, \sigma^2 \mathbf{I})) \\ &\leq \text{KL}(\mathcal{N}(\mu \hat{\mathbf{w}}, \mathbf{I}) || \mathcal{N}(0, \sigma^2 \mathbf{I})). \end{aligned}$$

The last inequality holds according to the chain rule of the KL divergence [1]. Taking  $\sigma^2 = 1 + \frac{\mu^2}{d}$  completes the proof.  $\square$

It is worth pointing out that (1) is almost a tight upper bound. Thus the dimensionality  $d$  involved is intrinsic. Note that  $\frac{d}{2} \ln(1 + \frac{\mu^2}{d}) \sim d \ln \mu$  as  $\mu \rightarrow \infty$ . In fact we can show  $\text{KL}(\mathcal{N}_p(\mu \hat{\mathbf{w}}, \mathbf{I}) || \mathcal{N}_p(0, \mathbf{I})) \sim (d-1) \ln \mu$ .

To see this, let  $P = \mathcal{N}_p(0, \mathbf{I})$ , and  $Q = \mathcal{N}_p(\mu \hat{\mathbf{w}}, \mathbf{I})$ . Since  $P$  is the uniform distribution on  $S^{d-1}$ , we have  $\text{KL}(Q || P) = \ln \frac{2\pi^{d/2}}{\Gamma(d/2)} - h(Q)$ , where  $h(Q)$  is the differential entropy of  $Q$ . So we only need to show  $-h(Q) \sim (d-1) \ln \mu$ . Let  $\hat{\mathbf{v}} \in S^{d-1}$ , and let  $\cos \alpha = \langle \hat{\mathbf{v}}, \hat{\mathbf{w}} \rangle$ . Let  $q(\hat{\mathbf{v}})$  be the density of  $Q$ . We have

$$\begin{aligned} q(\hat{\mathbf{v}}) &= \int_0^\infty \frac{1}{(2\pi)^{d/2}} \exp\left(-\frac{1}{2}(r^2 + \mu^2 - 2r\mu \cos \alpha)\right) r^{d-1} dr \\ &= \frac{\exp(-\frac{\mu^2 \sin^2 \alpha}{2})}{(2\pi)^{d/2}} \int_0^\infty \exp\left(\frac{1}{2}(r - \mu \cos \alpha)^2\right) r^{d-1} dr. \end{aligned}$$

Let

$$I_n(t) = \frac{1}{\sqrt{2\pi}} \int_0^\infty \exp\left(\frac{1}{2}(r - t)^2\right) r^{d-1} dr.$$

Integration by parts yields a recursive formula

$$I_n(t) = tI_{n-1}(t) + (n-2)I_{n-2}(t).$$

Also we have  $I_1(t) = \Phi(t)$ , and  $I_2(t) = \frac{e^{-\frac{t^2}{2}}}{\sqrt{2\pi}} + t\Phi(t)$ . Some calculation yields

$$I_d(t) = \frac{e^{-\frac{t^2}{2}}}{\sqrt{2\pi}} f_d(t) + \Phi(t)g_d(t),$$

where  $f_d(t)$  and  $g_d(t)$  are polynomials of  $t$  with  $(d-2)$  and  $(d-1)$  degree both with the leading coefficient being 1. Thus

$$q(\hat{\mathbf{v}}) = \frac{e^{-\frac{\mu^2}{2}}}{(2\pi)^{d/2}} f_d(\mu \cos \alpha) + \frac{\exp(-\frac{\mu^2 \sin^2 \alpha}{2})}{(2\pi)^{\frac{d-1}{2}}} \Phi(\mu \cos \alpha) g_d(\mu \cos \alpha).$$

When  $\mu$  is sufficiently large, the first term in above formula is clearly negligible. For the second term, we only need to consider  $\alpha \leq \mu^{-1/2}$ , since otherwise the term is negligible. Thus

$$\begin{aligned} \int_{S^{d-1}} q(\hat{\mathbf{v}}) \ln q(\hat{\mathbf{v}}) d\Omega &\sim \int_{S^{d-1}} q(\hat{\mathbf{v}}) \ln \left( \frac{\exp(-\frac{\mu^2 \sin^2 \alpha}{2})}{(2\pi)^{\frac{d-1}{2}}} \Phi(\mu \cos \alpha) (\mu \cos \alpha)^{d-1} \right) d\Omega \\ &\sim \ln \frac{\mu^{d-1}}{(2\pi)^{\frac{d-1}{2}}} + \int_{S^{d-1}, \alpha \leq \mu^{-1/2}} \frac{\exp(-\frac{\mu^2 \alpha^2}{2})}{(2\pi)^{\frac{d-1}{2}}} \mu^{d-1} \left( -\frac{\mu^2 \alpha^2}{2} \right) d\Omega. \end{aligned}$$

Some calculations show that

$$-\frac{d-1}{2} \leq \int_{S^{d-1}, \alpha \leq \mu^{-1/2}} \frac{\exp(-\frac{\mu^2 \alpha^2}{2})}{(2\pi)^{\frac{d-1}{2}}} \mu^{d-1} \left( -\frac{\mu^2 \alpha^2}{2} \right) d\Omega \leq 0.$$

We obtain the results.

**Proof of Proposition 3.2.** Obvious since  $\frac{d}{2} \ln \left( 1 + \frac{\mu^2}{d} \right) < \frac{\mu^2}{2}$  for any  $d < \infty$  and  $\mu > 0$ ; and as  $d \rightarrow \infty$ ,  $\frac{d}{2} \ln \left( 1 + \frac{\mu^2}{d} \right) \rightarrow \frac{\mu^2}{2}$ .  $\square$

**Proof of Corollary 3.3.** We will show that for every  $\epsilon > 0$  and every  $\delta \geq 2e^{-2n\epsilon^2}$ , with probability  $1 - \delta$

$$er_{\mathcal{D}}(c_{\mathbf{w}}) \leq er_{\mathcal{S}}(c_{\mathbf{w}}) + \sqrt{\frac{d \ln \left( 1 + \left( \frac{2n}{d} \right) \right) + \frac{1}{2} \ln \frac{2(n+1)}{\delta}}{n}} + 4\epsilon \quad (2)$$

holds simultaneously for all homogeneous linear classifiers  $c_{\mathbf{w}}$  with  $\mathbf{w} \in \mathbb{R}^d$  satisfying

$$P_{\mathcal{D}} \left( \left| y \cdot \frac{\langle \mathbf{w}, \mathbf{x} \rangle}{\|\mathbf{w}\| \|\mathbf{x}\|} \right| \leq \frac{td^{3/2}}{n^2} \right) \leq \epsilon, \quad (3)$$

where  $t = \frac{1}{4} \bar{\Phi}^{-1}(\epsilon)$ . Setting  $\epsilon = \frac{1}{4} \left( \frac{d + \ln n}{n} \right)^{1/2}$  yields the result (assuming  $n > 5$ ).

Set  $\mu = \frac{4n^2}{d^{3/2}}$  in Theorem 3.1. Also let  $Q(\mu, \hat{\mathbf{w}})$  be defined as in Theorem 3.1. By the simple fact that

$$kl(er_{\mathcal{S}}(Q) || er_{\mathcal{D}}(Q)) \geq 2(er_{\mathcal{S}}(Q) - er_{\mathcal{D}}(Q))^2,$$

we obtain from Theorem 3.1 that with probability  $1 - \frac{\delta}{2}$  for all  $\hat{\mathbf{w}} \in \mathbb{R}^d$  with  $\|\hat{\mathbf{w}}\| = 1$

$$er_{\mathcal{D}}(Q(\mu, \hat{\mathbf{w}})) \leq er_{\mathcal{S}}(Q(\mu, \hat{\mathbf{w}})) + \sqrt{\frac{d \left( \ln \left( 1 + \frac{2n}{d} \right) \right) + \frac{1}{2} \ln \frac{2(n+1)}{\delta}}{n}}. \quad (4)$$

Let  $\eta = \Phi^{-1}(\epsilon)$  and  $z = \mu y \frac{\langle \hat{\mathbf{w}}, \mathbf{x} \rangle}{\|\mathbf{x}\|}$ , we have

$$\begin{aligned}
er_{\mathcal{D}}(Q(\mu, \hat{\mathbf{w}})) &= E_{\mathcal{D}} \bar{\Phi}(z) \\
&= P_{\mathcal{D}}(z \leq \eta) \cdot E_{\mathcal{D}}(\bar{\Phi}(z) | z \leq \eta) + \\
&\quad P_{\mathcal{D}}(\eta < z \leq 0) \cdot E_{\mathcal{D}}(\bar{\Phi}(z) | \eta < z \leq 0) + \\
&\quad P_{\mathcal{D}}(z > 0) \cdot E_{\mathcal{D}}(\bar{\Phi}(z) | z > 0) \\
&\geq (er_{\mathcal{D}}(c_{\hat{\mathbf{w}}}) - \epsilon) \cdot (1 - \epsilon) \\
&\geq er_{\mathcal{D}}(c_{\hat{\mathbf{w}}}) - 2\epsilon.
\end{aligned} \tag{5}$$

By the assumption of the theorem and the Chernoff bound, it is easy to see that with probability  $1 - \frac{\delta}{2}$ , where  $\delta \geq 2e^{-2n\epsilon^2}$ ,

$$P_{\mathcal{S}} \left( \left| y \cdot \frac{\langle \hat{\mathbf{w}}, \mathbf{x} \rangle}{\|\mathbf{x}\|} \right| \leq \frac{\bar{\Phi}^{-1}(\epsilon) d^{3/2}}{4n^2} \right) \leq 2\epsilon.$$

Similarly we can also show that

$$er_{\mathcal{S}}(Q(\mu, \hat{\mathbf{w}})) \leq er_{\mathcal{S}}(c_{\hat{\mathbf{w}}}) + 2\epsilon. \tag{6}$$

Combining (4), (5) and (6) with the union bound, the theorem follows.  $\square$

**Proof of Proposition 3.4.** First it is easy to check that  $P_{\mathbf{w} \sim Q} \left( y \frac{\langle \mathbf{w}, \mathbf{x} \rangle}{\|\mathbf{x}\|} \leq \theta \right) = \bar{\Phi} \left( \mu y \frac{\langle \hat{\mathbf{w}}, \mathbf{x} \rangle}{\|\mathbf{x}\|} - \theta \right)$ , where  $Q$  is the abbreviation of  $Q(\mu, \hat{\mathbf{w}})$  defined in Theorem 3.1. Also observe that for every  $\theta$

$$I[t \leq 0] \leq \frac{\bar{\Phi}(t - \theta)}{\bar{\Phi}(-\theta)}.$$

Thus we have

$$\begin{aligned}
er_{\mathcal{D}}(c_{\hat{\mathbf{w}}}) &= E_{\mathcal{D}} I \left[ y \frac{\langle \hat{\mathbf{w}}, \mathbf{x} \rangle}{\|\mathbf{x}\|} \leq 0 \right] \\
&\leq E_{\mathcal{D}} \frac{\bar{\Phi} \left( \mu y \frac{\langle \hat{\mathbf{w}}, \mathbf{x} \rangle}{\|\mathbf{x}\|} - \theta \right)}{\bar{\Phi}(-\theta)} \\
&= \frac{1}{\bar{\Phi}(\theta)} E_{\mathbf{w} \sim Q} P_{\mathcal{D}} \left( y \frac{\langle \mathbf{w}, \mathbf{x} \rangle}{\|\mathbf{x}\|} \leq \theta \right) \\
&= \frac{er_{\mathcal{D}, \theta}(Q(\mu, \hat{\mathbf{w}}))}{\bar{\Phi}(\theta)}
\end{aligned}$$

$\square$

**Proof of Proposition 3.5.** Let  $\epsilon = er_{\mathcal{D}, \theta}(Q)$ . We only need to show

$$\epsilon + \bar{\Phi}(\theta) - \frac{\epsilon}{\bar{\Phi}(\theta)} \geq 0. \tag{7}$$

Note that  $1 - \Phi(\theta) = \bar{\Phi}(\theta)$ . The LHS of (7) equals to  $\bar{\Phi}(\theta) \left[ 1 - \frac{\epsilon}{\bar{\Phi}(\theta)} \right]$ .

Finally, observe that if  $\epsilon + \bar{\Phi}(\theta) < 1$ , then  $\epsilon < \bar{\Phi}(\theta)$ . The proposition follows.  $\square$

**Proof of Lemma 3.6.** Due to the symmetry of Gaussian distribution  $\mathcal{N}(\mu \hat{\mathbf{w}}, I)$ , simple analysis shows that  $P_{\mathbf{w} \sim \mathcal{N}(\mu \hat{\mathbf{w}}, I)} \left( y \frac{\langle \mathbf{w}, \mathbf{x} \rangle}{\|\mathbf{w}\| \|\mathbf{x}\|} \leq \theta \right)$  is only a function of  $\frac{\langle \hat{\mathbf{w}}, y \mathbf{x} \rangle}{\|\mathbf{x}\|}$ ,  $\theta$ , and  $\mu$ . We denote this function as  $F(\mu, \frac{\langle \hat{\mathbf{w}}, y \mathbf{x} \rangle}{\|\mathbf{x}\|}, \theta)$ .

A slight modification of the proof of Proposition 3.4 yields

$$er_{\mathcal{D}}(c_{\hat{\mathbf{w}}}) \leq \frac{er_{\mathcal{D},\theta}^{\mathbf{N}}(Q(\mu, \hat{\mathbf{w}}))}{F(\mu, 0, \theta)}. \quad (8)$$

Let  $\hat{\mathbf{u}}, \hat{\mathbf{v}}$  to be two unit vectors satisfying  $\langle \hat{\mathbf{w}}, \hat{\mathbf{u}} \rangle = 0$  and  $\hat{\mathbf{v}} = \sqrt{1 - \theta^2} \hat{\mathbf{u}} - \theta \hat{\mathbf{w}}$ . It's not difficult to show that for an arbitrary vector  $\mathbf{w}$ :

$$\langle \mathbf{w}, \hat{\mathbf{v}} \rangle \leq 0 \Rightarrow \frac{\langle \mathbf{w}, \hat{\mathbf{u}} \rangle}{\|\mathbf{w}\|} \leq \theta$$

Thus we have:

$$\begin{aligned} F(\mu, 0, \theta) &= P_{\mathbf{w} \sim \mathcal{N}(\mu \hat{\mathbf{w}}, I)} \left( \frac{\langle \mathbf{w}, \hat{\mathbf{u}} \rangle}{\|\mathbf{w}\|} \leq \theta \right) \\ &\geq P_{\mathbf{w} \sim \mathcal{N}(\mu \hat{\mathbf{w}}, I)} (\langle \mathbf{w}, \hat{\mathbf{v}} \rangle \leq 0) \\ &= \bar{\Phi}(-\mu\theta) = \Phi(\mu\theta) \end{aligned} \quad (9)$$

Combining (8) and (9) finishes the proof.  $\square$

**Proof of Proposition 3.7.** Immediate.  $\square$

## References

- [1] Thomas M. Cover and Joy A. Thomas. *Elements of Information Theory*. Wiley Series in Telecommunications. John Wiley & Sons, Inc., New York, USA, 1991.
